# Supplementary material for: Use of a Four-miRNA Panel as a Biomarker for the Diagnosis of Stomach Adenocarcinoma
Source: Hindawi journal article supplement (doi:10.1155/2020/8880937), 2020-11-07

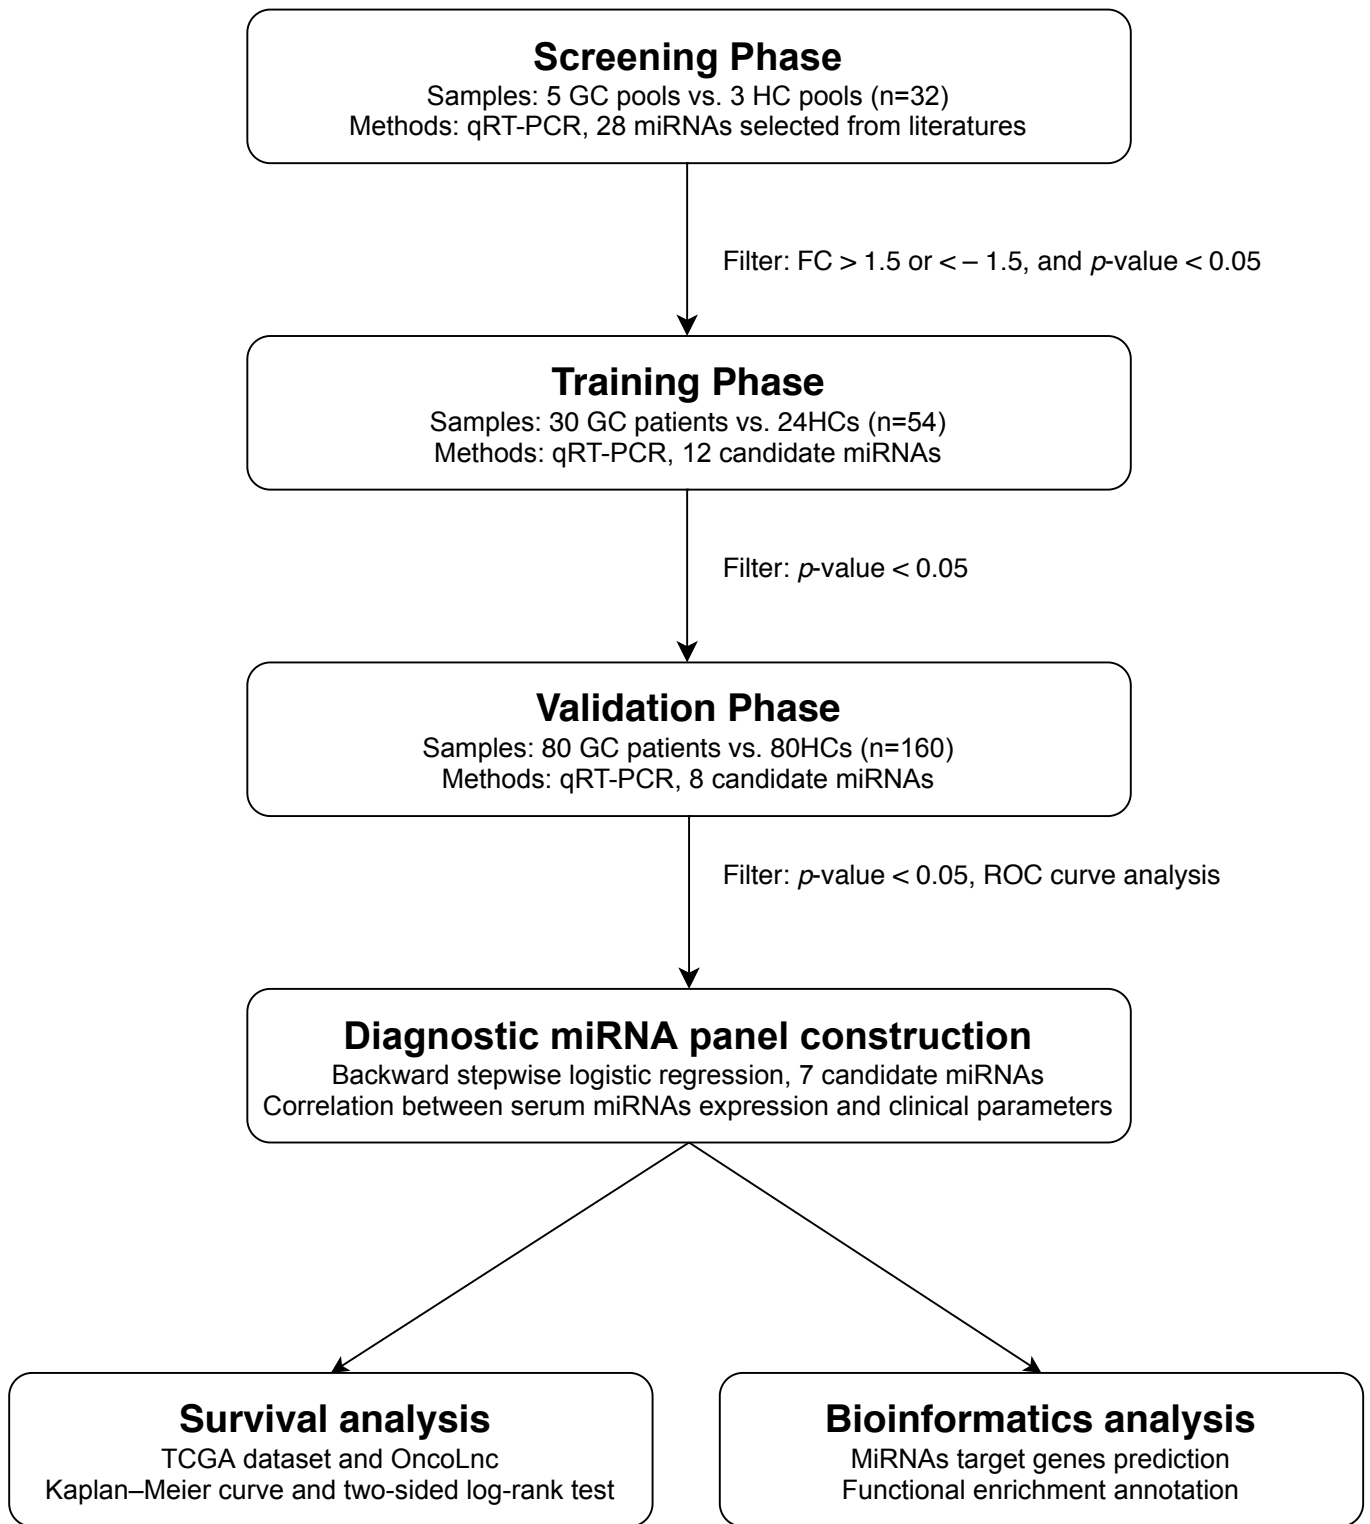

Supplement: f1 [file 8880937.f1.pdf]
